# Supplementary material for: Hemostatic Changes in Patients with COVID-19: A Meta-Analysis with Meta-Regressions
Source: PubMed Central journal article supplement (PMC7408674; doi:10.3390/jcm9072244), 2020-07-15
Supplement: jcm-09-02244-s001.pdf [file jcm-09-02244-s001.pdf]

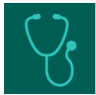

1  
2  
3  
4  
5  
6  
7  
8  
9  
10  
11  
12  
13  
14  
15  
16  
17  
18  
19  
20

# Haemostatic changes in patients with COVID-19: a meta-analysis with meta-regressions.

Matteo Nicola Dario Di Minno, MD PhD<sup>1</sup> Ilenia Calcaterra, MD<sup>2</sup> Roberta Lupoli, MD PhD<sup>3</sup>  
Antonio Storino, MD<sup>4</sup> Giorgio Alfredo Spedicato, PhD FCAS FSA CSPA CStat<sup>5</sup>  
Mauro Maniscalco, MD PhD<sup>4</sup> Alessandro Di Minno, PharmD PhD<sup>6\*</sup> Pasquale Ambrosino, MD PhD<sup>4\*</sup>

1 Department of Translational Medical Sciences, Federico II University, Naples, Italy.  
2 Department of Clinical Medicine and Surgery, Federico II University, Naples, Italy;  
3 Department of Molecular Medicine and Medical Biotechnologies, Federico II University, Naples, Italy;  
4 Istituti Clinici Scientifici Maugeri IRCCS, Pavia, Italy;  
5 Unipol Group, Bologna, Italy;  
6 Department of Pharmacy, Federico II University, Naples, Italy.

\* The two Authors share co-seniorship.

Correspondence: Alessandro Di Minno, PharmD PhD; Department of Pharmacy, Federico II University, Naples, Italy;  
Tel/Fax: +39.081.7464323; alessandro.diminno@unina.it

## Table of contents:

|                       |                                                                                                                                                                                            |
|-----------------------|--------------------------------------------------------------------------------------------------------------------------------------------------------------------------------------------|
| Supplemental Figure 1 | Preferred Reporting Items for Systematic Reviews and Meta-Analyses (PRISMA) flow diagram.                                                                                                  |
| Supplemental Figure 2 | Funnel plots of effect size versus standard error for studies evaluating the difference in PT, aPTT, D-Dimer, platelet count and fibrinogen.                                               |
| Supplemental Table 1  | <b>Meta-regression analyses. Impact of age, male gender, hypertension, diabetes, and C-reactive protein (CRP) on the difference in PT, D-Dimer, platelet count, and fibrinogen levels.</b> |
| Supplemental Table 3  | PubMed search ( <b>June 16, 2020</b> ).                                                                                                                                                    |

22



23 Supplemental Figure 1. Preferred Reporting Items for Systematic Reviews and Meta-Analyses (PRISMA) flow  
24 diagram.

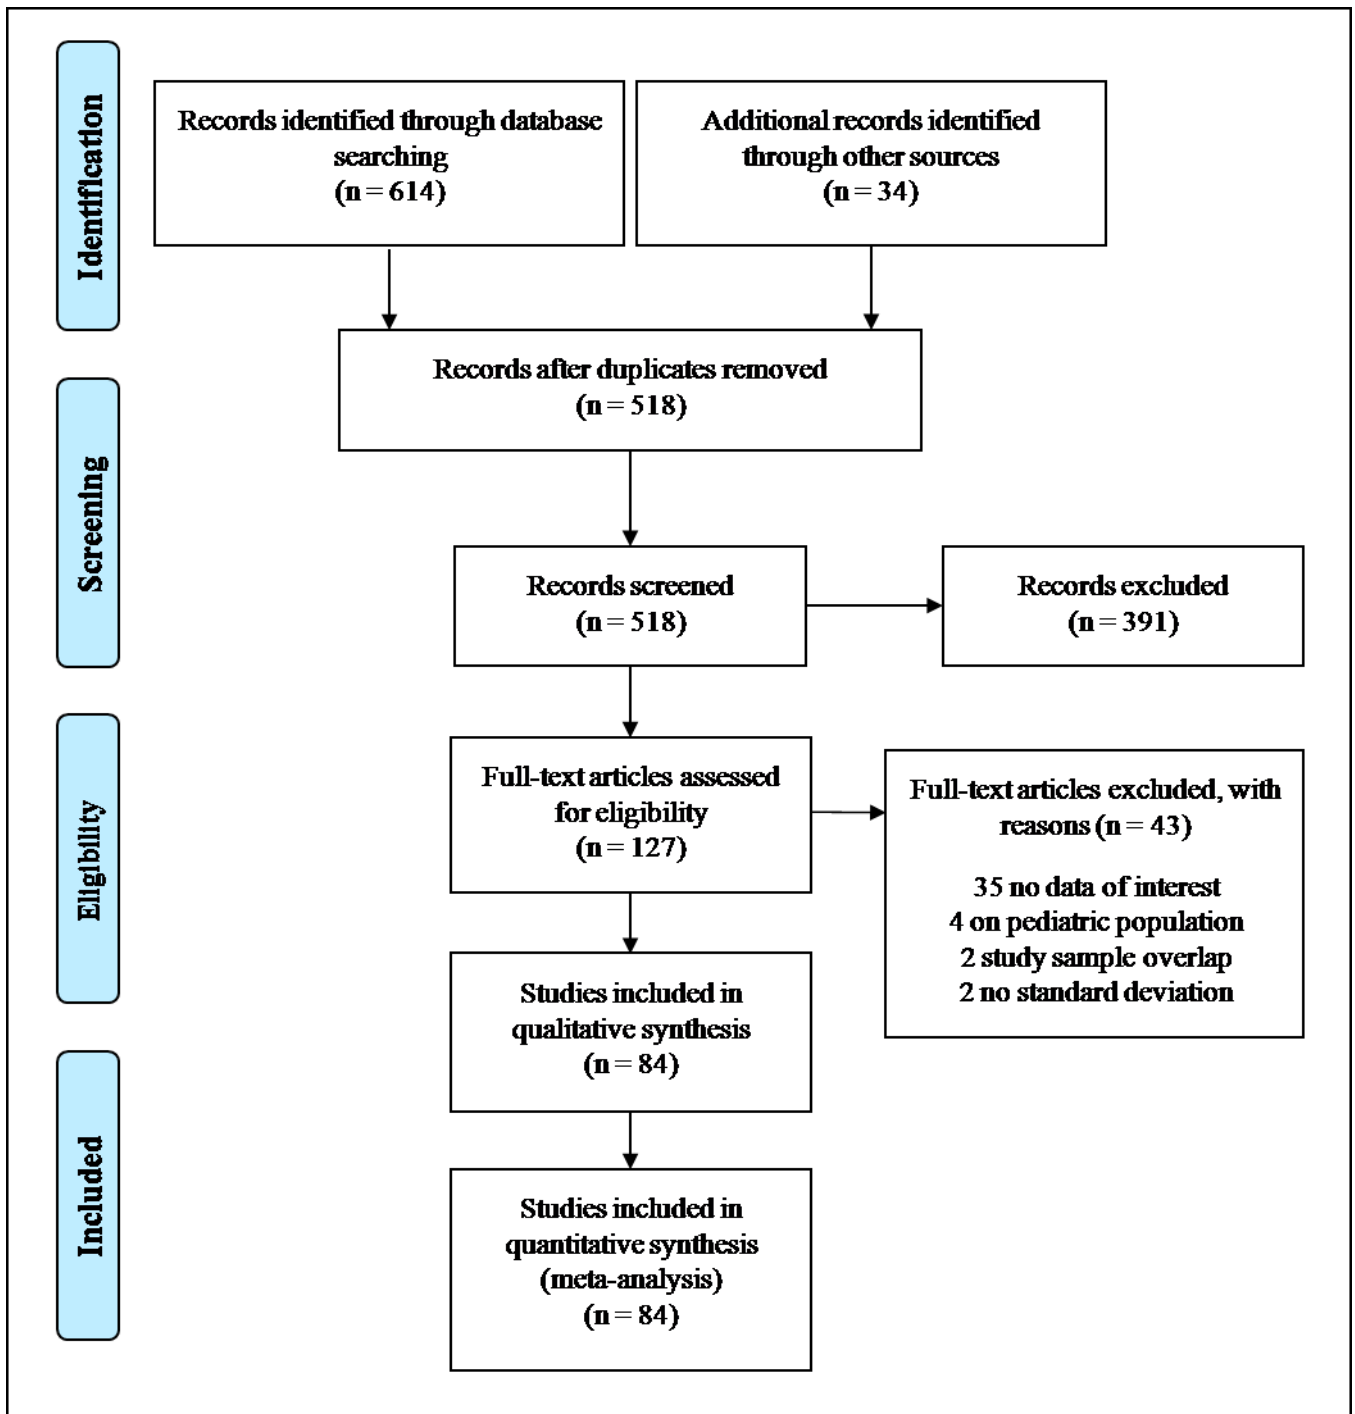

25

26

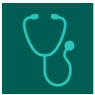

27 Supplemental Figure 2. Funnel plots of effect size versus standard error for studies evaluating the difference in  
28 prothrombin time (PT), activated partial thromboplastin time (aPTT), D-Dimer, platelet count and fibrinogen.

29 PT

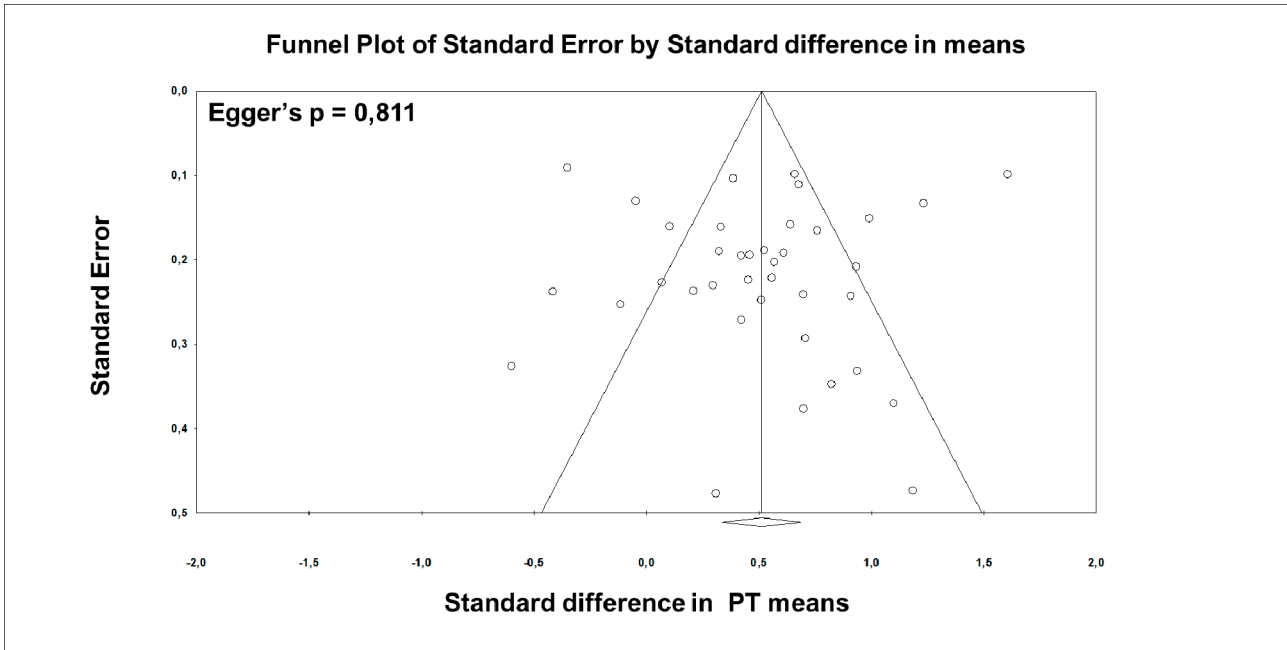

30

31

32 aPTT

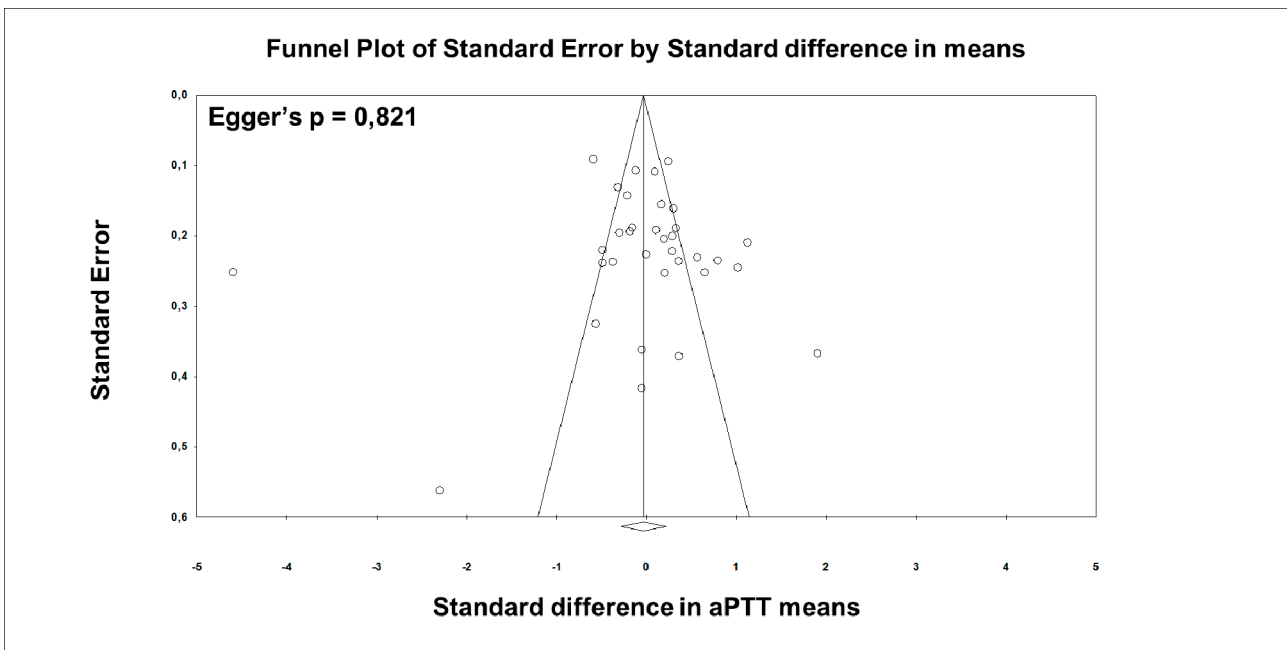

33

34

35

36



37 D-Dimer

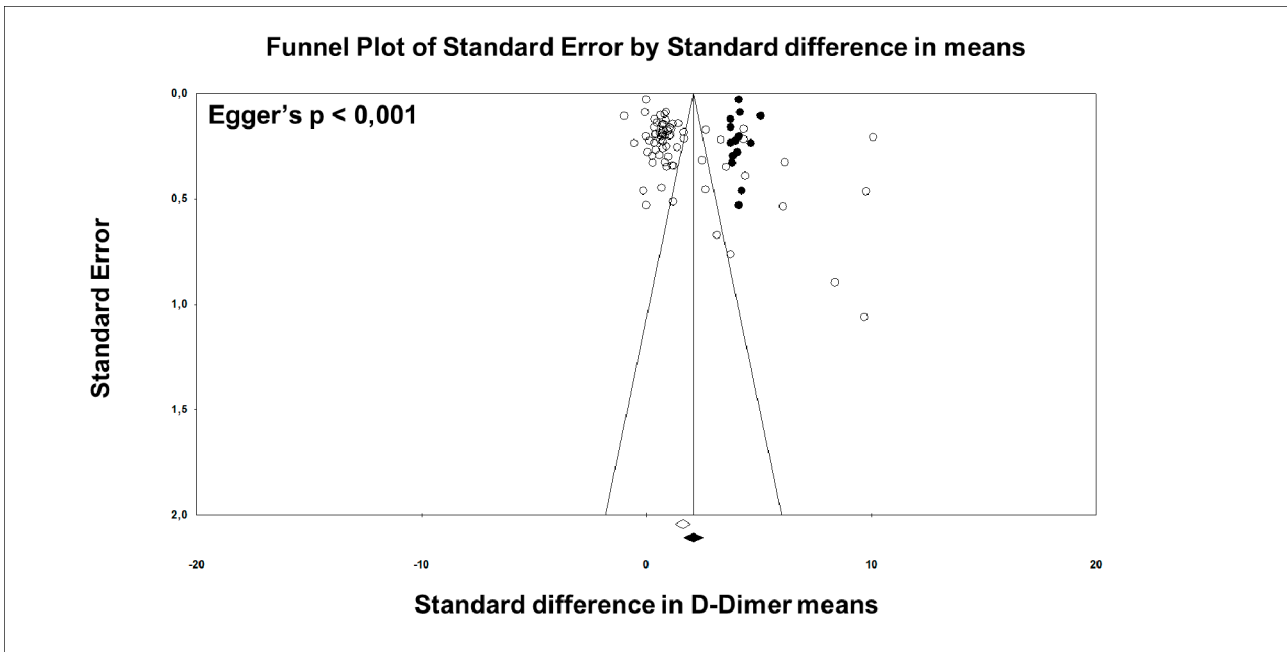

38

39 Platelet count

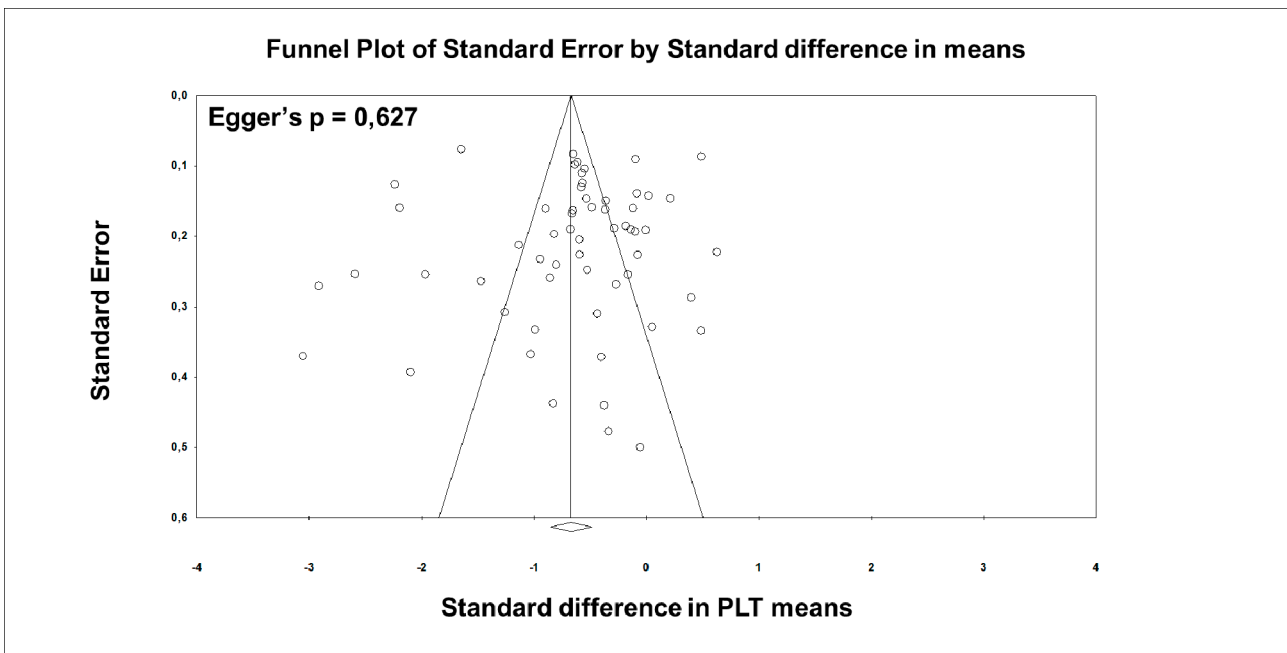

40

41

42

43

44

45



46 Fibrinogen

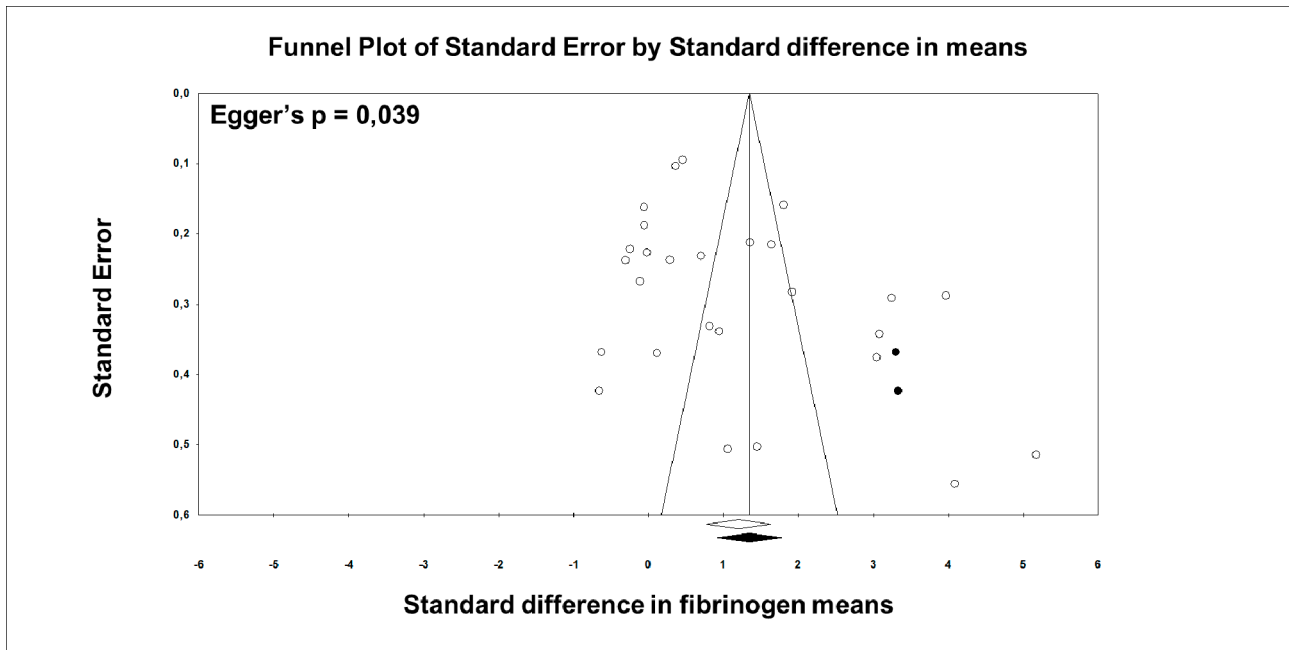

47

48

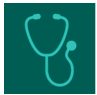

49  
50  
51

**Supplemental Table 1. Meta-regression analyses. Impact of age, male gender, hypertension, diabetes, and C-reactive protein (CRP) on the difference in PT, D-Dimer, platelet count, and fibrinogen levels.**

| Dependent variables |         | Independent variables |              |              |          |              |
|---------------------|---------|-----------------------|--------------|--------------|----------|--------------|
|                     |         | Age                   | Male sex     | Hypertension | Diabetes | CRP          |
| PT                  | Z-value | 1.04                  | -0.11        | -0.65        | -0.08    | <b>2.27</b>  |
|                     | P-value | 0.299                 | 0.915        | 0.513        | 0.935    | <b>0.023</b> |
| aPTT                | Z-value | -1.20                 | -1.28        | 1.03         | -0.85    | 1.01         |
|                     | P-value | 0.229                 | 0.202        | 0.301        | 0.396    | 0.314        |
| D-Dimer             | Z-value | -0.81                 | <b>-2.43</b> | -0.22        | 1.43     | -1.15        |
|                     | P-value | 0.418                 | <b>0.015</b> | 0.829        | 0.154    | 0.249        |
| PLT                 | Z-value | 0.53                  | <b>1.97</b>  | -0.41        | -0.76    | 0.50         |
|                     | P-value | 0.595                 | <b>0.048</b> | 0.684        | 0.450    | 0.619        |
| Fibrinogen          | Z-value | -0.77                 | 0.18         | <b>2.63</b>  | -1.35    | <b>2.89</b>  |
|                     | P-value | 0.440                 | 0.854        | <b>0.009</b> | 0.177    | <b>0.004</b> |

52

**Legend: CRP: C-reactive protein; PT: prothrombin time; aPTT partial thromboplastin PLT: platelet count.**

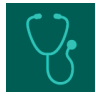

53 Supplemental Table 2. PubMed search (June 16, 2020).

| Keywords                                                                                                                                                                                 | Number of results |
|------------------------------------------------------------------------------------------------------------------------------------------------------------------------------------------|-------------------|
| (COVID-19 OR SARS-CoV-2)                                                                                                                                                                 | 22,792            |
| (COVID-19 OR SARS-CoV-2) AND (coagulative)                                                                                                                                               | 226               |
| (COVID-19 OR SARS-CoV-2) AND (coagulative OR coagulation)                                                                                                                                | 226               |
| (COVID-19 OR SARS-CoV-2) AND (coagulative OR coagulation OR haemostatic)                                                                                                                 | 257               |
| (COVID-19 OR SARS-CoV-2) AND (coagulative OR coagulation OR haemostatic OR hemostasis)                                                                                                   | 279               |
| (COVID-19 OR SARS-CoV-2) AND (coagulative OR coagulation OR haemostatic OR hemostasis OR prothrombin time)                                                                               | 290               |
| (COVID-19 OR SARS-CoV-2) AND (coagulative OR coagulation OR haemostatic OR hemostasis OR prothrombin time OR activated partial thromboplastin time)                                      | 292               |
| (COVID-19 OR SARS-CoV-2) AND (coagulative OR coagulation OR haemostatic OR hemostasis OR prothrombin time OR activated partial thromboplastin time OR platelet)                          | 369               |
| (COVID-19 OR SARS-CoV-2) AND (coagulative OR coagulation OR haemostatic OR hemostasis OR prothrombin time OR activated partial thromboplastin time OR platelet OR D-Dimer)               | 477               |
| (COVID-19 OR SARS-CoV-2) AND (coagulative OR coagulation OR haemostatic OR hemostasis OR prothrombin time OR activated partial thromboplastin time OR platelet OR D-Dimer OR fibrinogen) | 484               |
